# Supplementary material for: A Remarkable Genetic Diversity of Rotavirus A Circulating in Red Fox Population in Croatia
Source: MDPI journal article supplement (doi:10.3390/pathogens10040485), 2021-04-16
Supplement: s1 [file s1]

**Supplementary Table S1.** Primers used to genotype RVA strains detected in foxes.

| Segment/gene | Primer name  | Annealing position (nt)        | Primer sequence (5'→3')*              | RT-PCR product size (bp) | Reference | No. of fox RVA sequences | Genotypes                                                                                                                 | No. of sequences included in the phylogenetic analysis |  |  |  |  |
|--------------|--------------|--------------------------------|---------------------------------------|--------------------------|-----------|--------------------------|---------------------------------------------------------------------------------------------------------------------------|--------------------------------------------------------|--|--|--|--|
| VP7          | VP7-F        | 51-71                          | ATG TAT GGT ATT GAA TAT ACC AC        | 881                      | [29]      | 10                       | G8 (N= 2),<br>G9 (N= 2),<br>G10 (N= 2),<br>G11 (N= 1),<br>G15 (N= 1),<br>G? (N= 2) <sup>1</sup>                           | 9 <sup>a</sup>                                         |  |  |  |  |
|              | VP7-R        | 914-932                        | AAC TTG CCA CCA TTT TTT CC            |                          |           |                          |                                                                                                                           |                                                        |  |  |  |  |
|              | VP7-RINT**   | 331-344                        | ANA YNG ANC CWG TYG GCC A             | 293                      | [29]      | 10                       | G1 (N= 1),<br>G2 (N= 2),<br>G9 (N= 7)                                                                                     | 3 (G1, G2) <sup>b</sup>                                |  |  |  |  |
|              | Beg9         | 1-28                           | GGC TTT AAA AGA GAG AAT TTC CGT CTG G | 1062                     | [32]      | 0                        | n/a                                                                                                                       | n/a                                                    |  |  |  |  |
|              | End9         | 1036-1062                      | GGT CAC ATC ATA CAA TTC TAA TCT AAG   |                          |           |                          |                                                                                                                           |                                                        |  |  |  |  |
|              | VP7-up2      | 39-58                          | GCT CCT TTT AAT GTA TGG TA            | 956                      | [30]      |                          |                                                                                                                           |                                                        |  |  |  |  |
|              | VP7-down3    | 976-995                        | GAT CTY GAT CTY TTG GAC AT            |                          |           |                          |                                                                                                                           |                                                        |  |  |  |  |
|              | N-VP7F1      | 37-58                          | TAG CTC CTT TTR ATG TAT GGT A         | 333                      | [15]      | 6                        | G1 (N= 1),<br>G3 (N= 1),<br>G5 (N= 1),<br>G6 (N= 2),<br>G8 (N= 1)                                                         | 0                                                      |  |  |  |  |
|              | N-VP7R1      | 354-370                        | GTN GGC CAT CCT TTN GT                |                          |           |                          |                                                                                                                           |                                                        |  |  |  |  |
|              | N-VP7F2      | 49-71                          | ATG TAT GGT ATT GAA TAT ACC AC        | 193                      |           |                          |                                                                                                                           |                                                        |  |  |  |  |
| N-VP7R2      | 220-242      | GTR TCC ATD GAT CCA GTN ATT GG |                                       |                          |           |                          |                                                                                                                           |                                                        |  |  |  |  |
| VP4          | VP4_1-17F    | 1-19                           | GGC TAT AAA ATG GCT TCG C             | 700                      | [33]      | 1                        | P[13]                                                                                                                     | 1 <sup>c</sup>                                         |  |  |  |  |
|              | VP4R_DEG     | ?***                           | TCY CTR TTR TAT TGC ATY TCY TTC C     |                          |           |                          |                                                                                                                           |                                                        |  |  |  |  |
|              | VP4-HeadF    | 1-27                           | GGC TAT AAA ATG GCT TCG CTC ATT TA    | 1100                     | [30]      | 8                        | P[3] (N= 2),<br>P[11] (N= 2),<br>P[13] (N= 1),<br>P[21] (N= 1),<br>P[?] (N= 1) <sup>1</sup> ,<br>P[?] (N= 1) <sup>2</sup> | 8 <sup>d</sup>                                         |  |  |  |  |
|              | VP4-1094R2   | 1076-1101                      | AAT GCT TGT GAR TCR TCC CAR TAA TC    |                          |           |                          |                                                                                                                           |                                                        |  |  |  |  |
|              | VP4-F        | 132-149                        | TAT GCT CCA GTN AAT TGG               | 663                      | [29]      | 4                        | P[14] (N= 1),<br>P[23] (N= 1),<br>P[?] (N= 1) <sup>1</sup> ,<br>P[?] (N= 1) <sup>3</sup>                                  | 4 <sup>e</sup>                                         |  |  |  |  |
|              | VP4-R        | 775-795                        | ATT GCA TTT CTT TCC ATA ATG           |                          |           |                          |                                                                                                                           |                                                        |  |  |  |  |
|              | Rota-Seg4-s  | 766-788                        | TCT AAR ACA TCA TTN TGG AAR GA        | 312                      | [31]      | 1                        | P[11]                                                                                                                     | 0                                                      |  |  |  |  |
|              | Rota-Seg4-as | 1057-1078                      | GCT TGT GAA TCR TCC CAR TAA TC        |                          |           |                          |                                                                                                                           |                                                        |  |  |  |  |
|              | N-VP4F1      | 1-20                           | GGC TAT AAA ATG GYT TCN YT            | 257                      | [15]      | 0                        | n/a                                                                                                                       | n/a                                                    |  |  |  |  |
|              | N-VP4R1      | 236-257                        | ARY ADC CAR TAA TCR NYD RGT G         |                          |           |                          |                                                                                                                           |                                                        |  |  |  |  |
|              | N-VP4F2      | 10-32                          | ATG GYT TCN YTM ATT TAT AGA CA        | 214                      |           |                          |                                                                                                                           |                                                        |  |  |  |  |
|              | N-VP4R2      | 203-224                        | GNT GGY TGA TAW GGA CCR TCK A         |                          |           |                          |                                                                                                                           |                                                        |  |  |  |  |

\*N=A/C/G/T; R=A/G; D=A/G/T; Y=C/T; W=A/T; K=G/T; M=A/C

\*\*VP7-RINT was applied in combination with VP7-F

\*\*\*Annealing position was not provided by primer authors

<sup>1</sup>Two RVA strains (L138-VS and L148-VS) of the tentative novel G and P genotype

<sup>2</sup>RVA strain L281-OB of the tentative novel P genotype

<sup>3</sup>RVA strain L25-Var of the tentative novel P genotype

<sup>a</sup>GenBank accession numbers MW727429-MW727437

<sup>b</sup>GenBank accession numbers MW727426-MW727428

<sup>c</sup>GenBank accession number MW727444

<sup>d</sup>GenBank accession numbers MW727439-MW727443, MW727445-MW727447

<sup>e</sup>GenBank accession numbers MW727438, MW727448-MW727450
